1 Social signaling via bioluminescent blinks drives schooling behavior in the  
2 flashlight fish *Anomalops katoptron*

3

4

5 Peter Jägers<sup>1</sup>, Louisa Wagner<sup>1</sup>, Robin Schütz<sup>1</sup>, Maximilian Mucke<sup>1</sup>, Budiono Senen<sup>2</sup>

6 Gino V. Limmon<sup>3,4</sup>, Stefan Herlitze<sup>1#</sup>, Jens Hellinger<sup>1</sup>

7

8

9 <sup>1</sup>Department of General Zoology and Neurobiology, Institute of Biology and Biotechnology, Ruhr-University Bochum, 44780  
10 Bochum, Germany

11 <sup>2</sup>Fisheries College Hatta-Syahrir, Banda Naira, Maluku Tengah, Indonesia

12 <sup>3</sup>Department of Aquatic Resources Management, Faculty of Fisheries and Marine Science, Pattimura University Ambon,  
13 Indonesia

14 <sup>4</sup>Maritime and Marine Science Center for Excellence of Pattimura University Ambon, Indonesia

15

16 #corresponding author: [sxh106@gmail.com](mailto:sxh106@gmail.com)

17

18 Abstract

19

20 The bioluminescent flashlight fish *Anomalops katoptron* live in schools of several hundred specimens.  
21 To understand how flashlight fish, integrate bioluminescent signaling into their schooling behavior,  
22 we analyzed movement profiles and blink frequencies. Isolated specimen of *A. katoptron* show a high  
23 motivation to align with fixed or moving artificial light organs. Depending on presented frequencies  
24 *A. katoptron* responds with a reduction in swimming speed and its own blink frequency. Higher  
25 presented blink frequencies reduce the nearest neighbor distance. In the natural environment  
26 *A. katoptron* is changing its blink frequencies and nearest neighbor distance in a context specific  
27 manner. Blink frequencies are increased from day to night and during avoidance behavior, while  
28 nearest neighbor distance is decreased with increasing blink frequencies. *A. katoptron* changes its  
29 blink frequencies by modifying light organ occlusion. Our results suggest that visually transmitted  
30 information via specific blink patterns determine intraspecific communication and group cohesion in  
31 schooling *A. katoptron*.

## 32 Introduction

33 Bioluminescence is a widespread phenomenon in ocean-dwelling organisms including a broad  
34 phylogenetic distribution in marine fish <sup>1</sup>. In ray finned fish bioluminescence evolved independently  
35 at least 27 times <sup>2</sup>. In vertebrates only fish possess the ability to emit light via own photophores,  
36 bioluminescent bacteria hosted within specialized light organs or kleptoproteins acquired from prey  
37 <sup>3</sup>.

38 Numerous functions of bioluminescence have been described and suggested such as  
39 counterillumination <sup>4,5</sup>, mate attraction <sup>6</sup>, prey attraction <sup>7</sup> and prey illumination in flashlight fish  
40 (Anomalopidae) <sup>8</sup>. All members of the family Anomalopidae such as *Photoblepharon* and *Anomalops*  
41 are characterized by bean-shaped, subocular light organs <sup>9,10</sup>. In *Photoblepharon steinitzi* three  
42 distinct functions in bioluminescent signaling like finding prey, intraspecific communication and  
43 confusing predators via a “blink and run-pattern” have been proposed <sup>11,12</sup>. *Photoblepharon* reside  
44 solitary- or pairwise in territories (e.g. reef caves) while *Anomalops katoptron* (Anomalopidae) occur  
45 in large, moving schools during moonless nights <sup>8,13</sup>.

46 The extrinsic, continuous bioluminescent light in *A. katoptron* is produced by symbiotic  
47 bioluminescent bacteria *Candidatus photodesmus katoptron* (Gammaproteobacteria: Vibrionaceae)  
48 hosted within subocular light organs. Anomalopid symbionts show a genome reduction like other  
49 unrelated, obligate symbiotic bacteria, such as insect endosymbionts. It has been proposed that  
50 symbionts of *A. katoptron* are transmitted during an active environmental phase <sup>14–16</sup>. Symbiotic  
51 bacteria are densely packed in numerous tubules that are aligned at right angles to the light-emitting  
52 surface of light organs <sup>8,16,17</sup>. The inner surface of light organs contains two stacks of guanine crystals,  
53 which serve as reflector to enhance light emission <sup>18</sup>. At the anterior edge light organs are attached  
54 to suborbital cavities via the rod like “Ligament of Diogenes” which allows a downward rotation. This  
55 exposes the dark pigmented back of light organs and disrupts light output. The visual system of  
56 *A. katoptron* is optimized to detect wavelengths in the frequency range of its own bioluminescent  
57 symbionts <sup>19,20</sup>. Fascinating blink patterns of large schools can be observed on coral reefs in the Indo-  
58 Pacific during dark and moonless nights <sup>13,21</sup>. During the daytime *A. katoptron* hides in crevices, caves  
59 or deep water <sup>8,21</sup>.

60 In general, groups of fish show various formations ranging from loose aggregations to highly aligned  
61 groups moving in synchronized directions <sup>22,23</sup>. Living in a group can be advantageous in several  
62 aspects like lower predation risk, mate choice <sup>24</sup>, reduced metabolic costs <sup>25</sup> and higher probability in  
63 detecting food sources <sup>26</sup>. It has been proposed that a synchronized organization within the school

64 leads to lower vulnerability<sup>27</sup>. Group size and cohesion play an important role in schooling and can  
65 reduce the risks of being preyed through attack abatement<sup>28</sup> or confusion of predators<sup>29</sup>.

66 The ability to sense intraspecific group members is important to maintain the formation of a school  
67<sup>30</sup>. Sensory input from vision and lateral lines are integrated to determine attraction or repulsion in  
68 moving groups. Partridge & Pitcher suggested that vision is primarily used for maintenance of  
69 position and angle between fish while lateral lines monitor swimming speed and direction of moving  
70 neighbors<sup>31</sup>. The school formation is situation-dependent and can be interpreted as an integration of  
71 surrounding ecological factors. For example higher predation regimes force shoaling groups of  
72 *Poecilia reticulata* (Poeciliidae) to form denser aggregations with closer nearest neighbor distance  
73<sup>27,32</sup>. Collective behavior has been recently analyzed with computer models and/or robotic dummies  
74 revealing strong correlation between decision rules of individuals driving group behavior<sup>33–36</sup>.

75 Providing information to conspecifics is an important feature to maintain the functionality of a  
76 dynamic group and can be observed on inter-individual and/or group level<sup>35</sup>. Many different ways of  
77 intraspecific communication are described within fish just as mutual allocation in the weakly electric  
78 fish *Mormyrus rume proboscirostris* (Mormyridae) via electrocommunication that leads to social  
79 attention<sup>37</sup> or startle response as a reaction on moving neighbors in *Clupea harengus* (Clupeidae)<sup>38</sup>.

80 As nocturnal animals live under visual restriction, bioluminescent signaling can become an additional  
81 source of information<sup>7</sup> e.g. in orientation towards conspecifics shown in ostracodes (Cypridinidae)  
82<sup>39,40</sup>, dragonfish (Stomiidae)<sup>41,42</sup> or pony fish (Leiognathidae)<sup>43</sup>. For *Gazza minuta* (Leiognathidae)  
83 discrete projected luminescent flashes have been described. Possible functions are spacing between  
84 foraging individuals, keeping the school together or reproductive activities each represented in  
85 different flash patterns<sup>44</sup>.

86 It has been shown that *A. katoptron* uses its light organs to actively localize food. During feeding the  
87 light organs reveal a prolonged exposure and shorter occlusion time resulting in decreased blink  
88 frequencies<sup>8</sup>. In addition, it has been described that the light organs play a role in orientation  
89 towards conspecifics in schooling behavior of *A. katoptron*<sup>13</sup>.

90 In this study we investigated how *A. katoptron* behaviorally responds to different artificial light  
91 stimuli and if these behavioral responses can be compared to a context-dependent blinking behavior  
92 observed in the natural environment at the Banda Sea. We found that *A. katoptron* is attracted by  
93 blue green light (500 nm) in a blink frequency and light intensity dependent manner. The fish  
94 responds with an adjustment of its own blink frequencies, where the light organ occlusion, but not  
95 the exposure time is adjusted. Higher blink frequencies are correlated with closer nearest neighbor  
96 distance leading to a higher group cohesion. Thus, our study shows for the first time that the blink

- 97 frequencies of the bioluminescent light of the flashlight fish *A. katoptron* is used for a context  
98 dependent, intraspecific communication.

## 99 Results

100 To investigate how bioluminescent signaling emitted by the light organs of the splitfin flashlight fish  
101 *Anomalops katoptron* is used for intraspecific communication, we investigated the behavioral  
102 responses of isolated flashlight fish to artificial light pulses in the laboratory. It has been suggested  
103 that *A. katoptron* in its natural environment reveal a schooling behavior. To investigate if and how  
104 *A. katoptron* reacts to different light signals we isolated *A. katoptron* in an experimental tank (Fig. 1A,  
105 1B). In the middle of the tank we introduced a light emitting dummy and defined two areas, where  
106 we analyzed the duration of how long the fish spend in this area, i.e. one area close to the dummy  
107 (center area) and one area close to the exit area (exit door) of the tank. This exit door is normally  
108 open and connects the experimental tank with the housing tank. Without light stimulation  
109 individuals stayed for  $64.4 \pm 5.7\%$  (Fig. 1A, 1C) of the time in the exit area compared to the center  
110 area. Fish were swimming with a swimming speed of  $0.19 \pm 0.01$  m/s (Fig. 1D). Stimulation with  
111 artificial light organs caused an orientation towards the fish dummy (Fig. 1B). Isolated specimen  
112 spent  $79.7 \pm 3.9\%$  of the time in the center around the light emitting dummy (LED timing: 2 Hz,  
113 0.25 s on + 0.25 s off) and reduced their swimming speed. (Fig. 1C and 1D, Video S1).

114 Control experiments showed that the shape of the dummy does not have an impact on the behavior  
115 of *A. katoptron* (Fig. S1). These findings suggest that light pulses are used for intraspecific  
116 communication of *A. katoptron* and that *A. katoptron* is attracted by these light pulses (Fig. 1).

117 To investigate if the light intensity of light pulses plays a role for intraspecific communication, we  
118 determined the emitted light intensity of *A. katoptron's* light organs. Light emitted by luminous  
119 bacteria housed within the light organs of *A. katoptron* had a maximum intensity of  $0.27 \mu\text{W}$   
120 (emission peak at 510 nm wavelength,  $n=5$ ; Fig. S2). We next applied LED light stimuli (1 Hz,  
121 0.5 s on + 0.5 s off) with light intensities of 0.12, 0.33 and  $1.52 \mu\text{W}$  (at 504 nm wavelength) and found  
122 that increasing light intensities resulted in decreased blink frequencies. There were no differences in  
123 distances kept to the dummy (around  $15.67 \pm 0.64$  cm). Thus, throughout the experiments we used a  
124 LED light, with an intensity at 504 nm wavelength of  $0.23 \mu\text{W}$  (except for the intensity experiments),  
125 which is slightly dimmer than the light emitted from the light organ of *A. katoptron*.

126 To investigate if the blink frequency is important for intraspecific communication, we presented  
127 three different blink frequencies (0.5 Hz; 1 Hz & 2 Hz) with equally distributed LED light on- and off-  
128 times (Fig. 1C-F). While there was no difference in time spent in the center area (Fig. 1C), there was a  
129 frequency-dependent change in swimming speed (Fig. 1D), the blink frequency response (Fig. 1E)  
130 along with the exposure and occlusion of the light organs (Fig. 1F). A light stimulation of 0.5 Hz  
131 resulted in a swimming speed of  $0.146 \pm 0.009$  m/s, which is faster than the swimming speed

132 determined for 1 Hz and 2 Hz stimulation (1 Hz ( $0.115 \pm 0.008$  m/s), 2 Hz ( $0.119 \pm 0.006$  m/s),  
 133 RM ANOVA 0.5 Hz compared to: 1 Hz,  $p = 0.014$ ; 2 Hz,  $p = 0.023$ ; Fig. 1D).

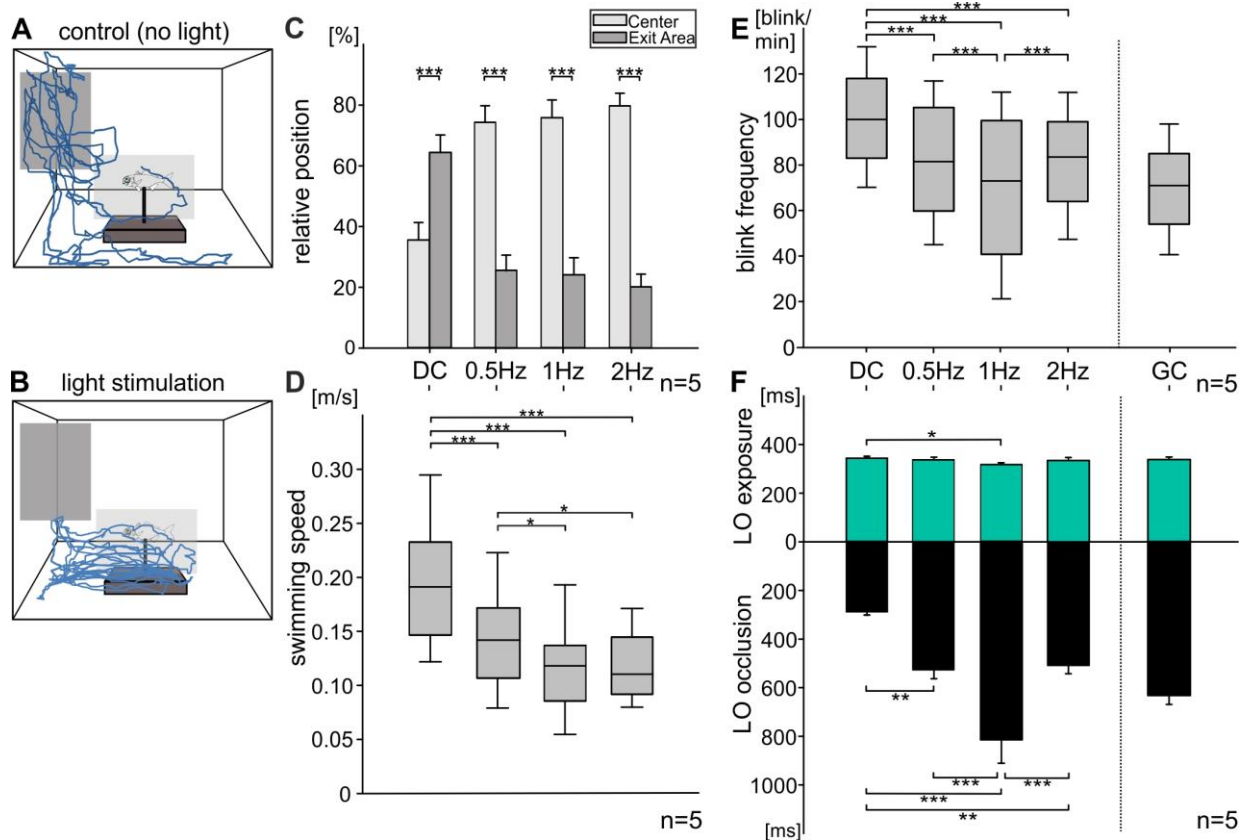

134

135 **Figure 1. Changes in positioning, swimming speed, blink frequency and light organ occlusion of flashlight fish**  
 136 **(A. katoptron) induced by a fish dummy equipped with artificial light organs.**

137 (A, B) Example of two- dimensional trajectories for (A) control without and (B) 1 Hz stimulation (LED light pulses  
 138 with equal distributed on- and off times) of isolated flashlight fish (n=5). Boxes indicate the two defined areas  
 139 of interest, which were analyzed. Dark gray is defined as “Exit Area” and light gray as “Center”, where the  
 140 dummy with artificial light organs was placed. Each trajectory was traced for 60 s.

141 (C) Relative Positioning ( $\pm$  SEM) of isolated *A. katoptron* (n=5) in areas of interest during four different stimuli  
 142 (DC, dark control; 0.5, 1, 2 Hz blinking LED with equal distributed LED on- and off- times within artificial light  
 143 organs).

144 (D) Swimming speed (m/s) of isolated *A. katoptron* (n=5) during four different stimuli (DC; 0.5, 1, 2 Hz blinking  
 145 LED with equal distributed LED on- and off- times).

146 (E) Blink frequencies of *A. katoptron* (n=5) induced by four stimuli (DC; 0.5, 1, 2 Hz blinking LED with equal  
 147 distributed LED on- and off- times). Additionally, blink frequencies of a group consisting of five individuals (GC),  
 148 which is divided by a scattered line, were analyzed. Individuals were tested separately before group  
 149 experiments.

150 (F) Mean light organ exposure and occlusion time ( $\pm$  SEM) during four different stimuli and a group control (DC,  
 151 dark control; 0.5, 1, 2 Hz blinking LED within artificial light organs with equal distributed LED on- and off- times;  
 152 GC, group control). Upper lines refer to stimulation as seen in (E). Greenish bars indicate exposure of light  
 153 organs and occlusion of light organs is represented by black bars (n=5).

154 DC, dark control; GC, group control. Significance values are reported as \* $p < 0.05$ , \*\* $p < 0.01$ , \*\*\* $p < 0.001$ .  
 155 Error bars indicate  $\pm$  SEM.

156 We next analyzed the blink frequency responses of *A. katoptron*. We found that during schooling  
157 behavior in the tank the average blink frequency of individuals was 1.17 Hz ( $69.88 \pm 1.78$  blinks/min),  
158 while in isolation the blink frequency is increased to 1.67 Hz ( $100.39 \pm 1.83$  blinks/min). At 1 Hz LED  
159 light stimulation, the blink frequency of *A. katoptron* was  $70.25 \pm 2.72$  blinks/min and was  
160 comparable to the blink frequency within the school (i.e. 1.17 Hz), but is increased to 1.35 Hz for  
161 0.5 Hz and 2 Hz light stimulation.

162 Next we investigated mean light organ exposure and occlusion for the different experimental light  
163 pulse settings. We found that the time individuals expose light organs is around 330 ms, which was  
164 comparable throughout the experiments (DC ( $344 \pm 0.005$  ms), 0.5 Hz ( $338 \pm 0.004$  ms), 1 Hz  
165 ( $317 \pm 0.006$  ms), 2 Hz ( $336 \pm 0.008$  ms); Fig. 1F). In contrast, differences existed in how long the  
166 organ is occluded. We found that in isolation the fish decreases its occlusion time to  $287 \pm 0.01$  ms,  
167 while during schooling ( $618 \pm 0.069$  ms) and in the presence of the light stimuli, light organ occlusion  
168 increased (0.5 Hz ( $528 \pm 0.035$  ms), 1 Hz ( $967 \pm 0.092$  ms), 2 Hz ( $0.507 \pm 0.036$  ms); Fig. 1F). These  
169 findings suggest that light organ occlusion defines blink frequencies during schooling.

170 Thus, the findings on blink frequencies related to light organ occlusion, orientation and swimming  
171 speed led us to the hypothesis that the timing of light pulses emitted by *A. katoptron* bear  
172 information to keep attraction and alignment of *A. katoptron* to its conspecifics.

173 To investigate this hypothesis, we established a second experimental setup in a circular arena tank,  
174 with a light pulse emitting dummy in the middle of the arena (Fig. 2A). We changed the LED off-times  
175 between 200 ms and 500 ms with on-times at 300 ms and examined the distance of the individuals  
176 towards the artificial light organs of the dummy in the center using heat maps. Without light  
177 stimulation individuals were swimming along the wall and avoiding the middle of the arena (Fig. 2C1)  
178 with a mean distance of  $42.25 \pm 0.76$  cm to the dummy (Fig. 2B). During light stimulation  
179 *A. katoptron* changed its swimming behavior in an off-time dependent manner (Fig. 2C2-3). A 500 ms  
180 LED off-time resulted in a closer but still partly decentralized orientation ( $23.63 \pm 0.88$  cm) towards  
181 the dummy in comparison to the dark control (DC; RM ANOVA:  $p < 0.001$ , Fig. 2C2; Video S2). The  
182 closest and centralized orientation towards the LED dummy occurred with 200 ms off-time LED  
183 stimulation (Fig. 2C3). These findings suggest that light organ occlusion contains information about  
184 nearest neighbor distance for *A. katoptron*.



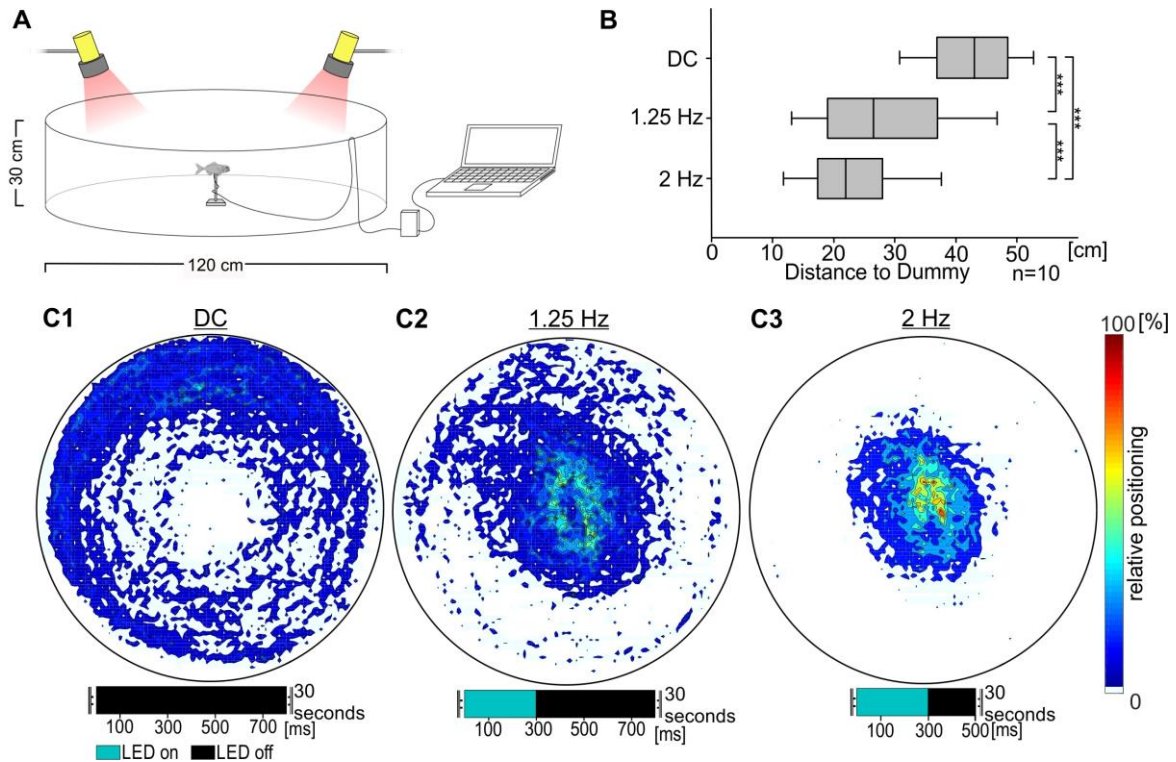

185

186 **Figure 2. Nearest neighbor distance communicated via artificial light organs within flashlight fish**  
187 **(*A. katoptron*).**

188 (A) Experimental setup for the validation of changes in nearest neighbor distance. Artificial light organs of a  
189 center placed dummy were emitting different light stimulations (1.25 Hz, LED off-time 500 ms; 2 Hz LED off-  
190 time 200 ms) for 30 seconds. An additional control without light stimulation was performed (DC, dark control).  
191 In this experiment LED off-timing was adjusted while LED on-time was consistent for 300 ms.

192 (B) Distance between isolated specimen (n=10) and the center placed fish dummy equipped with artificial light  
193 organs.

194 (C) Heat Maps indicate relative positioning of *A. katoptron* (n=10) in relation to a light (C2/C3) or no light (C1)  
195 emitting dummy. A closer orientation can be observed with shorter intervals (200 ms) between constant light  
196 emittance of 300 ms. Without light stimulation individuals show a wall following behavior. Heat Maps are  
197 based on all trajectories recorded for each stimulation.

198 DC, dark control. Significance values are reported as: \*p < 0.05, \*\*p < 0.01, \*\*\*p < 0.001

199

200 In the ocean, schools of *A. katoptron* constantly move through the open water, suggesting that  
201 individuals recognize/monitor their nearest neighbor to stay aligned. Thus, we next examined if  
202 *A. katoptron* would follow a moving light signal. To perform this experiment, we used an  
203 experimental setup, in which 13 LEDs arranged in a circular swimming tank separated by an angle of  
204 27.7° lit up for 300 ms consecutively clockwise or counterclockwise (Fig. 3A, S3 and Video S3).

205 Isolated specimens were following the counter- or clockwise rotating LED light to 75 % of the time  
206 without showing off-time-dependency (Fig. S3). A higher swimming speed of *A. katoptron* was  
207 observed for the 200 ms off-times ( $0.285 \pm 0.013$  m/s), representing faster moving LEDs, in  
208 comparison to the 500 ms off-times ( $0.246 \pm 0.007$  m/s) and the control without light stimulation

209 (DC;  $0.213 \pm 0.008$  m/s) (Fig. 3B). In contrast, the fish follows the rotating LEDs at 500 ms off-times  
 210 closer and with higher precision (1.25 Hz;  $0.771 \pm 0.013$ ; Fig. 3C, 3D2) in comparison to 200 ms off-  
 211 times (2 Hz;  $0.63 \pm 0.023$ ; Fig. 3C, 3D3) and control (DC;  $0.365 \pm 0.013$ ; Fig. 3C, 3D1). The results  
 212 suggest that *A. katoptron* lose precision to follow artificial light organs at higher swimming speeds.

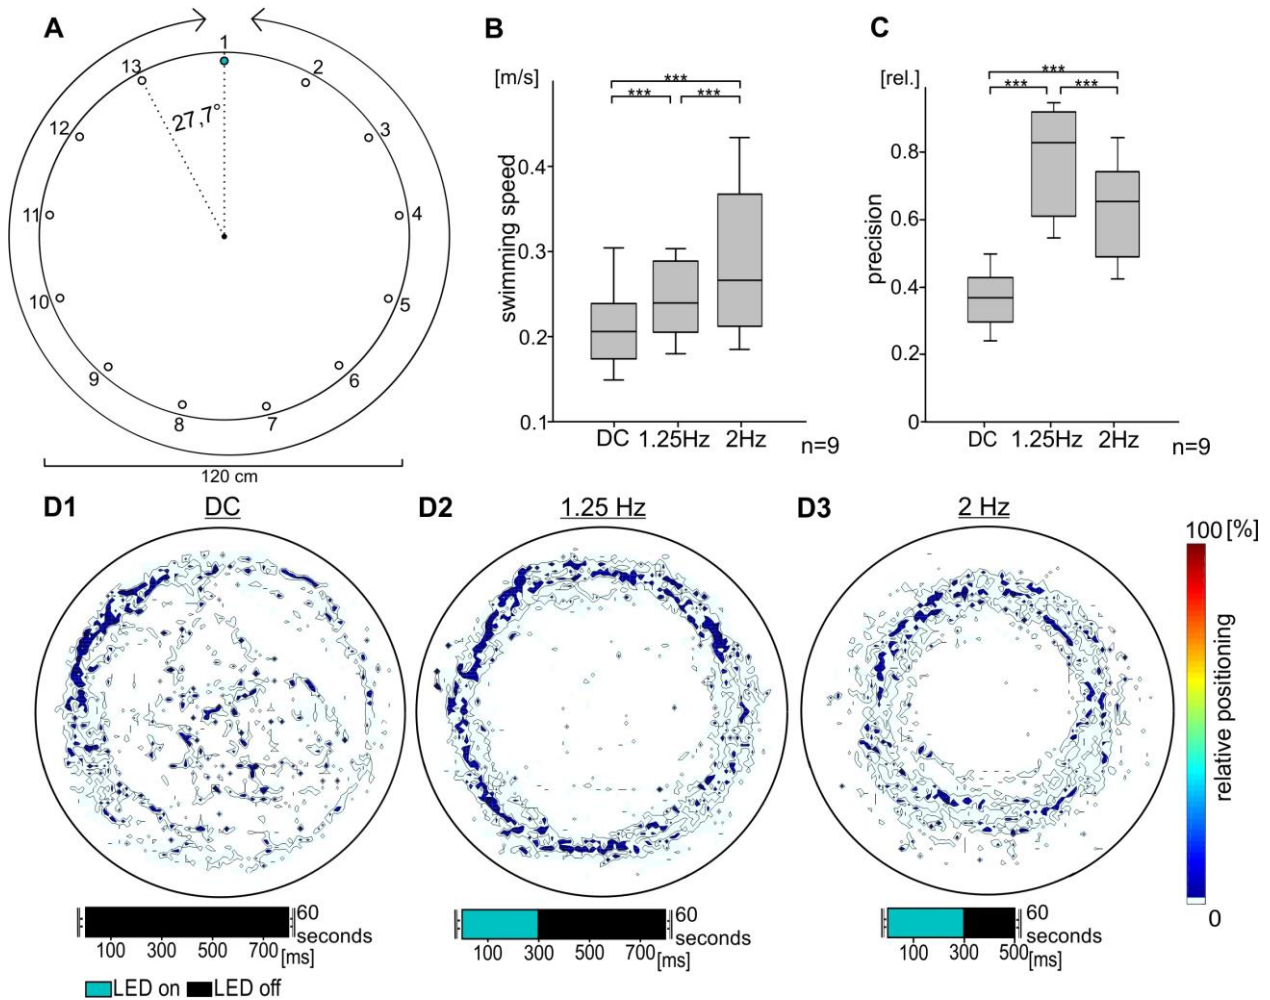

213

214 **Figure 3. Motivation of flashlight fish (*A. katoptron*) to follow a moving light source.**

215 (A) Experimental setup with 13 wall mounted LEDs that were triggered consecutively counter- or clockwise.  
 216 Intervals between 300 ms light emittance were 200 ms (2 Hz) or 500 ms (1.25 Hz) (travelling speed of light:  
 217 200 ms, 0.58 m/s; 500 ms, 0.36 m/s). Each fish was tested for 60 seconds in 5 trials.

218 (B) Mean swimming speed of isolated *A. katoptron* (n=9) during control (DC, dark control), 200 ms off (2 Hz)  
 219 and 500 ms off (1.25 Hz) times.

220 (C) We estimated relative distance between specimen of *A. katoptron* (n=9) and the center of the tank  
 221 according to the motivation of individuals to follow the moving light source.

222 (D) Heat Maps indicate relative positioning of *A. katoptron* (n=9) during light stimulation (D2/D3) and control  
 223 (D1, DC). Heat Maps are based on five trials for one isolated specimen.

224 DC, dark control; \*p < 0.05, \*\*p < 0.01, \*\*\*p < 0.001.

225 We next investigated the blinking behavior of several schools of *A. katoptron* in the ocean at a cave  
226 near Ambon and on a reef flat of Banda Island, Maluku, Indonesia. During the day the school of  
227 *A. katoptron* could be observed within the cave, while at sunset the school left the cave to approach  
228 the reef flat. We also observed a context dependent blink behavior and distinguished three different  
229 behavioral conditions, i.e. blinking behavior in the cave during the day, blinking behavior at the reef  
230 flat during the night and blinking behavior during avoidance triggered by a red diving torch. As also  
231 observed in the aquarium, blink frequencies increased from 1.96 Hz (cave,  $117.69 \pm 1.55$  blink/min,  
232 Video S4), 3.33 Hz (reef flat,  $199.71 \pm 3.21$  blink/min, Video S5) to 3.97 Hz (avoidance,  
233  $238.45 \pm 4.79$  blink/min, Video S6, Fig. 4A) with light organ occlusion ranging from  $347.14 \pm 10.8$  ms  
234 (cave),  $120.66 \pm 2.39$  ms (reef flat) to  $68.65 \pm 2.34$  ms (avoidance, RM ANOVA:  $p < 0,001$ ), while light  
235 organ exposure remained constant at around 230 ms (cave =  $229.91 \pm 3.05$  ms, reef  
236 flat =  $219.63 \pm 4.79$  ms, avoidance =  $233.89 \pm 6.53$  ms, Fig. 4B). In addition, we found that the  
237 variation in blink frequencies is highest during avoidance behavior (Gaussian distribution;  $X$   
238 ( $\mu=3.97$  Hz;  $\sigma^2=3.062$  Hz)) and low during daytime, while hiding in the caves (Gaussian distribution;  $X$   
239 ( $\mu=1.96$  Hz;  $\sigma^2=0.476$  Hz)) (Fig. 4C). During avoidance behavior the relative nearest neighbor distance  
240 is reduced compared to reef flat schooling behavior from  $2.03 \pm 0.169$  SL ( $n = 37$ ) to  $1.42 \pm 0.09$  SL  
241 ( $n = 46$ ) and an increased group cohesion becomes obvious in the synchronized escape movements  
242 (Fig. 4D).

243

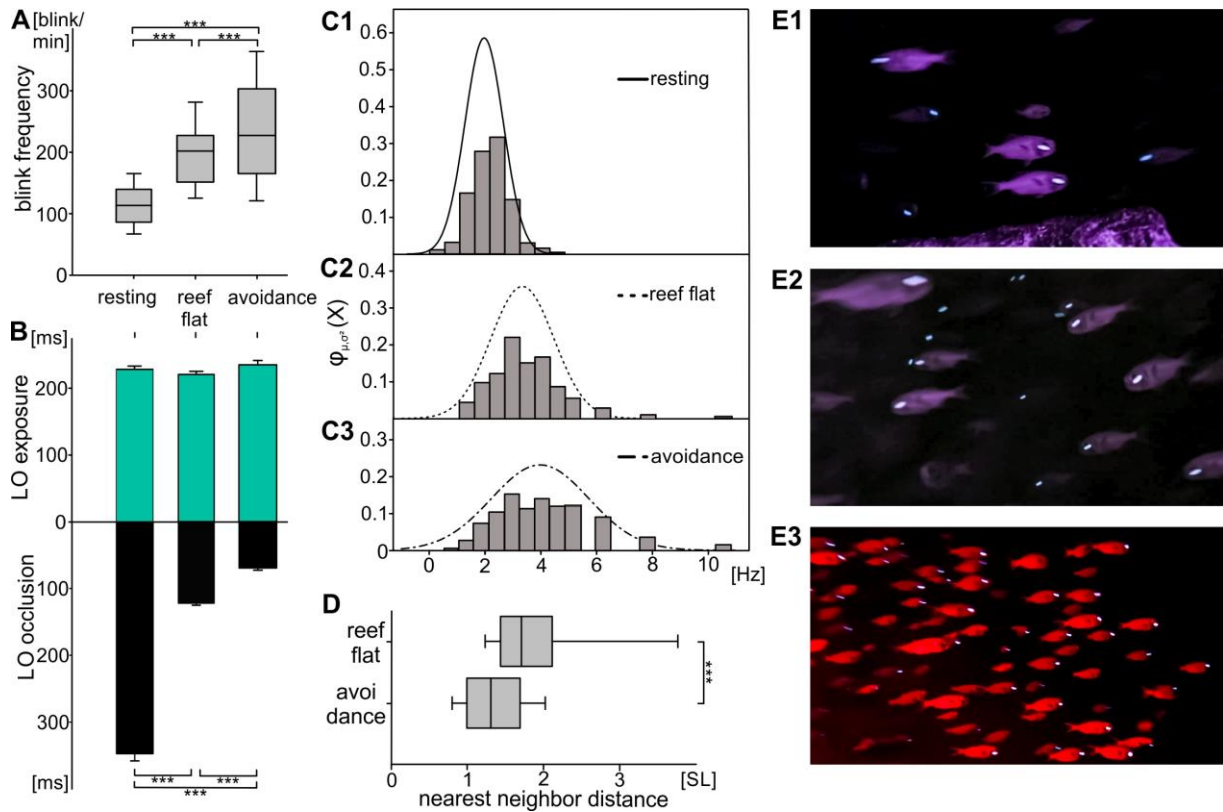

244

245 **Figure 4. Analysis of the blinking behavior and nearest neighbor distance of schools of *A. katoptron* in**  
 246 **Ambon, Maluku, Indonesia.**

247 The behavior of *A. katoptron* was analyzed for three conditions: in a cave during the day, during the night at  
 248 the reef flat close to the cave and during avoidance behavior in the night.

249 (A) Analysis of blink frequencies of *A. katoptron* in the cave, at the reef flat and during avoidance. Blink  
 250 frequencies were calculated by analyzing alternating light organ exposition and occlusion (cave n=709; reef flat  
 251 n=444 and avoidance n=478).

252 (B) Mean light organ exposure and occlusion ( $\pm$  SEM) of *A. katoptron* in the cave (open n=823; closed n=761), at  
 253 the reef flat (open n=502; closed n=445) and during avoidance (open n=516; closed n=478). Upper lines refer to  
 254 stimulation as seen in (A).

255 (C) Relative distribution of blink frequencies of *A. katoptron* observed while resting in the cave (C1), at the reef  
 256 flat (C2) and during avoidance (C3). Bars represent histogram with bin size of 0.6 Hz. Distribution was fitted  
 257 with normal (Gaussian) distribution (cave,  $X$  ( $\mu=1.96$ ,  $\sigma^2=0.476$ ); reef flat,  $X$  ( $\mu=3.33$ ,  $\sigma^2=1.278$ ); avoidance,  $X$   
 258 ( $\mu=3.97$ ,  $\sigma^2=3.062$ )).

259 (D) Analysis of the distance between specimen of *A. katoptron* on the reef flat and during avoidance.  
 260 Screenshots of recordings were taken before (n=37) and during avoidance reaction (n=46) and analyzed.  
 261 Avoidance was triggered by illumination of schooling *A. katoptron* with red diving torches. Distance is given as  
 262 standard length (SL).

263 (E) Example still images of the videos of *A. katoptron* schooling during day in the cave (E1), during the night on  
 264 the reef flat (E2) and during avoidance behavior in the night (E3).

265 Significance values are reported as: \*p < 0.05, \*\*p < 0.01, \*\*\*p < 0.001. Error bars indicate  $\pm$  SEM

## 266 Discussion

267 In this study we found that variation in blink frequencies of the bioluminescent splitfin flashlight fish  
268 *Anomalops katoptron* is used for intraspecific communication important for schooling behavior.  
269 Schools of *A. katoptron* can be observed at dark and moonless nights at the water surface in the  
270 Indo-Pacific. *A. katoptron* emit short bioluminescent light pulses using specialized light organs  
271 situated under the eye during schooling<sup>8,13</sup>. These subocular light organs are densely packed with  
272 bioluminescent, symbiotic bacteria (*Candidatus photodesmus katoptron*), which continuously  
273 produce bioluminescent light<sup>14-16</sup>. The fish disrupts light emission by a downward rotation of the  
274 light organ. Thus, exposure and occlusion of the light organ can produce specific blink frequencies<sup>45</sup>.  
275 We found that adjustment of the blink frequencies of *A. katoptron* depends on variations within the  
276 occlusion and not the exposure of the light organ while schooling. Light organ exposure is  
277 comparable to previous laboratory (383 ms;<sup>8</sup>) and field (166 ms;<sup>13</sup>) studies. In comparison longer  
278 flash durations of 400 ms in *Lampanyctus niger*<sup>42</sup> and 1000-2000 ms in *Gazza minuta*<sup>44</sup> have been  
279 described in other bioluminescent fish.

280 Intraspecific recognition/communication is important to establish and maintain group structures<sup>46</sup>.  
281 Species-specific signals like visual cues<sup>30,47</sup>, motion<sup>48</sup>, auditory<sup>49</sup> or electric signals<sup>37</sup> have been  
282 described to be involved in this process. Visual cues are important to detect position and movement  
283 of conspecifics<sup>31</sup> or predators<sup>50</sup> in fish and become crucial in species that live under dim/low light  
284 conditions such as *A. katoptron*<sup>7</sup>. The bioluminescent light of *A. katoptron* is used for actively finding  
285 food and is most likely important for schooling behavior under dim light conditions and, therefore,  
286 for intraspecific communication<sup>8,13</sup>. In our study we showed that *A. katoptron* follows moving LED  
287 light pulses and that the swimming speed is adjusted to the moving light. The speed of the moving  
288 LEDs (200 ms off-time; travel speed of light: 0.58 m/s) potentially exceeded the mean swimming  
289 speeds of *A. katoptron* ( $0,285 \pm 0.013$  m/s), since individuals could follow the moving LEDs at lower  
290 moving speed more precisely. Mean swimming speeds depend on various factors such as body size,  
291 tail beat frequency, scale types or hydrodynamic effects<sup>51</sup>. The mean swimming speed of  
292 *A. katoptron* was estimated to 3,5 BL/s (body length per second), which correlates with other marine  
293 species<sup>24,52,53</sup>.

294

295 We also analyzed the blinking behavior of *A. katoptron*. We found that for intraspecific recognition  
296 *A. katoptron* only uses information of the blinking light and not the body shape, since we did not  
297 detect differences in the blink behavior when we used LEDs or LEDs implanted within a fish dummy.  
298 We also found that higher light intensities of the LEDs induced lower blink frequencies of  
299 *A. katoptron*. One possibility is that higher intensity light is causing stronger behavioral responses,



300 because the higher intensity light penetrates further through water and could be received as a closer  
301 schooling neighbor. We measured for the first time the maximal light intensity of light emitted by the  
302 light organ from *A. katoptron* which was at 0.27  $\mu\text{W}$  at 510 nm wavelength. The retina of  
303 *A. katoptron* has also the maximal light sensitivity in this range<sup>19</sup>. Light intensity could potentially  
304 represent fitness levels of individuals as *A. katoptron* tend to loose luminescence due to starvation<sup>54</sup>.  
305 Other fish species prefer to shoal with healthy conspecifics<sup>55,56</sup>. Schooling fish tend to show  
306 consistency in their appearance (confusion effect)<sup>29,57</sup> and often do not show a sexual dimorphism  
307 including flashlight fish (but also see pony fish *Gazza minuta*)<sup>44,58</sup>.

308  
309 The most important result of our study is that blink frequencies adjusted by light organ occlusion  
310 determine nearest neighbor distance. We suggest that light organ exposure and occlusion are  
311 alternating signals for attraction and repulsion in defining nearest neighbor distance in schooling  
312 *A. katoptron*. Nearest neighbor distance is a key factor in schooling fish and determines group  
313 cohesion<sup>59</sup>. The shape of a school is the integration of individual responses on surrounding ecological  
314 factors<sup>46</sup>. Thereby intraspecific signals such as bioluminescent blinks in flashlight fish need to be  
315 included. In ponyfish (Leiognathidae) luminescent flashes have been proposed to function in spacing  
316 between individuals and keeping the school together<sup>60</sup>. Here we present a mechanism that  
317 potentially drives the opposing forces of attraction and repulsion in bioluminescent fish.

318  
319 To gain an understanding of how blinking behavior is used for intraspecific communication in the  
320 field, we analyzed the blinking behavior of schools of *A. katoptron* in a cave during the day and at the  
321 entrance of the cave during the night in Ambon, Maluku, Indonesia using infrared recordings. We  
322 found that the blink frequency decreased during the day in comparison to blink behavior at night.  
323 Blinking behavior increased when fish were illuminated with a red torch, which caused an avoidance  
324 behavior and a reduction in the nearest neighbor distance. This became obvious by a change from a  
325 broad to a dense school formation. Increased blink frequencies seem to be correlated with stress  
326 reactions, since we observed increased blink frequencies when *A. katoptron* were isolated in the  
327 laboratory. Increase in blink frequencies are also known from *Photoblepharon steinitzii*, when  
328 artificial intruders have been introduced into their territory<sup>12</sup>.

329 In conclusion, our study shows that *Anomalops katoptron* uses intraspecific, bioluminescent blink  
330 signals for communication of nearest neighbor distance important for group cohesion during  
331 schooling.

## 332 Methods

### 333 Recordings in the Laboratory

### 334 Maintenance of *A. katoptron*

335 A group of splitfin flashlight fish *A. katoptron* was kept in a reef tank (600 l; 135 cm length x 66 cm  
336 depth x 70 cm height). All specimens were obtained from a commercial wholesaler (De Jong  
337 Marinelife, Netherlands) and captured at the Cebu Islands (Philippines). For at least six weeks prior to  
338 the experiments *A. katoptron* were kept in the reef tank (temperature: 26°-27°C; salinity: 36 ‰; 12 h  
339 day and night cycle). The housing tank (600 l; 135 cm length x 66 cm depth x 70 cm height) was  
340 connected to an additional filter sump containing phosphate absorber, activated carbon, protein  
341 skimmer and an UV-sterilizer. The specimens were fed once a day with defrosted zooplankton (mysid  
342 shrimps), fish/lobster eggs and fine minced, defrosted salmon. Feeding occurs under dim red light to  
343 obtain visual observation on fitness levels of individuals. Information on age is missing because all  
344 individuals were wild collected imports. No visible differences between females and males were  
345 observed. Individuals were identified by size, slight differences in pigmentation and intensity of light  
346 organs.

### 347 Artificial light organs and fish dummies

348 A fish dummy with artificial light organs was made of black silicon (food safe silicon MM720 FG;  
349 Silikonfabrik; Germany). The shape of the dummy was modelled based on several photographs and  
350 had a total length (TL) of 101 mm. At the anterior-ventral side an oval shaped opening was cut out of  
351 the dummy. The cutout was equipped with a LED to imitate the light organs of *A. katoptron*. The LED  
352 was connected to an Arduino microcontroller (Arduino Mega 2560; Arduino; Italy). Resistors  
353 between LED and microcontroller were set to an output flow of 1 mA. The LED was waterproof glued  
354 (2-K epoxy glue; UHU; Germany) in an acrylic glass tube (length 15 mm; external diameter 7 mm)  
355 painted with flat white acrylic paint (Revell; Germany) to diffuse the LED light. The acrylic glass inlet  
356 was mounted in the fish dummy (artificial light organ length: 10 mm; height: 7 mm). The LED (Nichia  
357 3mm LED cyan 14.720mcd; Winger; Germany) had a peak wavelength at 500 nm and was adjusted to  
358 the mean light emittance of 0.23  $\mu\text{W}/\text{nm}$  of *A. katoptron*'s light organs (Fig. S2). Intensities of light  
359 organs (n=5) and LEDs were measured with a spectrometer (Ocean Optics; Flame; United States).

360 The microcontroller was set to control artificial light organs in relation to on- and off-times. The  
361 control software was written with Matlab (Matlab 2015r) and the open source Arduino software  
362 (Arduino 1.8.10). LED light intensities were adjusted by using a pulse width modulation (PWM).

363 Recordings in the experimental tank and arena experiments (see below) were made with an infrared  
364 (IR) sensitive camcorder (Sony HDR-CX 730; 6.3 mm CMOS-Sensor, 24.1 megapixel, video resolution  
365 1920 × 1080 pix, 50 fps) mounted on a custom made aluminum stand. Video files were converted to  
366 audio video interleave-format (.avi) with a resolution of 1080 x 720 pix and 25 fps using Adobe  
367 Premiere Elements 15 (Adobe; United States).

368

#### 369 Blink frequencies (equal LED on- and off- times)

370 The recording tank was divided in the middle with a grey PVC plate. Specimens could switch sides  
371 through a lockable slide door (20 x 20 cm). One of the sides contained daytime shelters made from  
372 clay tiles whilst the other half was blank except for a flow pump (EcoDrift 4.2; Aqua Medic;  
373 Germany). Specimen of *A. katoptron* (n=5) were isolated on the blank side (60 cm x 60 cm x 60 cm)  
374 of the experimental tank and habituated for five minutes prior to the experiment.

375 The fish dummy was placed in the middle of the recording tank. Each light stimulus was presented  
376 for a duration of five minutes. Every stimulus presentation was repeated five times. Here we chose  
377 equal distributed on- and off times in LED timing with 0.5 Hz (1 s on- and 1 s off-time), 1 Hz (0.5 s on-  
378 and 0.5 s off-time) and 2 Hz (0.25 s on- and 0.25 s off-time). Previous laboratory experiments showed  
379 a nearly equal distribution of light organ exposure and occlusion times while swimming in a group <sup>8</sup>.  
380 We performed a control experiment with turned off artificial light organs (DC, dark control)  
381 implemented in the dummy. The camera was mounted on a tripod in front of the tank. Two IR-lights  
382 each consisting of five high power LEDs with 860 nm peak wavelength (WEPIR1-S1 IR Power 1 W,  
383 Winger Electronics GmbH, Germany) were placed 10 cm above the tank.

384 In a second experiment, we analyzed the role of dummy (fish) shape and isolated light organ  
385 dummies on the behavior of *A. katoptron* (n=5; same individuals used in the first experiment).  
386 Therefore, an isolated light organ dummy (LED as described above) was used during stimulation. We  
387 chose a light stimulation protocol of 1 Hz (0.5 s on- and 0.5 s off-times) because this stimulation had  
388 the strongest effect on blink frequencies of isolated specimen. In the next step we analyzed  
389 differences in blink frequencies for two specimens with intact light organs as well as one specimen  
390 with intact and one with non-glowing light organs to test orientation of *A. katoptron* towards light  
391 organs of conspecifics (Fig. S1). In this case, we performed a frame by frame analysis (video analysis  
392 software; Vidana 1.0) of distances between individuals. All stimuli were presented for five minutes in  
393 a pseudo-randomized order. Five repetitions were performed for each specimen.

394 Blink frequencies (reported in blink/min) and light organ exposure -/occlusion-times (reported in ms)  
395 were analyzed frame by frame using Solomon Coder (Version 19.08.02). Mean values of blink



396 frequencies and light organ exposure-/occlusion-times were analyzed with Excel (Excel 2016).  
397 Successive exposure and occlusion events were summarized as blink event.

398 Trajectories were analyzed with the video analysis software Vidana 1.0. Two rectangles of interest  
399 (ROI) were defined to analyze the swimming profiles in *A. katoptron*. As individuals could switch  
400 between the two sides of the tank amongst experiments, we defined the areas where occurrence  
401 was most likely. The area around the closed door was declared as “exit area”. The area around the  
402 dummy placed in the middle was defined as “center”.

#### 403 Arena experiment 1: Nearest Neighbor Distance

404 Large-scale swimming profiles during presentation of a fish dummy with artificial light organs were  
405 analyzed in a circular arena with 120 cm diameter (Winipet Dogpool; China). Seawater from the  
406 housing tank was used to ensure equal parameters in water chemistry e.g. carbon hardness, nitrate  
407 and pH values. The arena was filled with approximately 170 l seawater (15 cm water level). Single  
408 specimen of *A. katoptron* (n=10) were transferred to the arena using a hand net (12.5 cm x 10 cm;  
409 Sera; Germany). Prior to the experiments fish were habituated for five minutes in the arena tank. A  
410 fish dummy with artificial light organs (as described above) was placed 7.5 cm over the tank bottom  
411 in the center of the arena. In this experiment artificial light organs were constantly glowing up for  
412 300 ms whereas off-times changed. The occlusion of artificial light organs was adjusted to 200 ms  
413 (2 Hz stimulation) or 500 ms (1.25 Hz stimulation) but consistent during one trial. We additionally  
414 performed a control experiment without light emitted by the dummy (DC, dark control). Stimuli were  
415 randomly presented for 30 seconds with six repetitions. Videos were recorded using an infrared (IR)  
416 sensitive Sony HDR-CX730E camcorder (1920 x 1080 pix; 50 fps) mounted above the arena on a  
417 custom made stand. Two IR-lights each consisting of five high power LEDs (WEPIR1-S1 IR Power 1 W,  
418 Winger Electronics GmbH, Germany) were placed besides the arena mounted on custom made  
419 holding devices. Tracking profiles of *A. katoptron* were analyzed using the video analysis software  
420 Vidana 1.0. Heat maps were generated in Matlab (Matlab R2015b). Here we summarized equal  
421 positions of standardized tracking profiles to estimate relative occurrences of *A. katoptron*.

422

#### 423 Arena experiment 2: Swimming Speed

424 To validate the following behavior and maximum swimming speeds of *A. katoptron* we established an  
425 array of LEDs that were rotated consecutively to simulate a moving light organ. In this experiment, 13  
426 LEDs were wall-mounted in an equal distributed distance (specifications circular arena see above).  
427 Angle between LEDs was set to 27.69°. The LEDs were placed on a water level of 7.5 cm. On-times of  
428 LEDs was permanently set to 300 ms while interval among the light onset between two LEDs was

429 changed. During one trial intervals between two LEDs were set to 200 ms or 500 ms. LEDs were  
430 triggered clockwise or counter clockwise in a pseudo randomized order. A dark control (DC)  
431 experiment without light stimulation was performed to avoid potential orientation cues from the  
432 periphery of the experimental arena. Handling of *A. katoptron* as described under Arena  
433 Experiment 1.

434 Experiments in single specimens of *A. katoptron* (n=9) were started after five minutes habituation  
435 time in the arena. Each stimulus was presented for 60 s. Specimens were tested five times for each  
436 stimulus. Movement profiles, swimming speed and radius of *A. katoptron* were analyzed using the  
437 video analysis software Vidana 1.0. Relative movement directions were estimated with Solomon  
438 Coder (Version 19.08.02). We estimated the precision of *A. katoptron* to follow moving light sources  
439 on a defined radius (distance between individuals and center of the tank). For each stimulation  
440 (1.25 Hz, 2 Hz & DC) we calculated the probability of individuals to move with the direction of light  
441 (Fig. S3). During dark control (DC) isolated individuals were moving clockwise ( $0.41 \pm 0.034$ ),  
442 counterclockwise ( $0.44 \pm 0.034$ ) or without a defined movement direction, declared as other  
443 ( $0.15 \pm 0.001$ ). Isolated specimen were following the counter- or clockwise rotating LED light to  
444  $0.724 \pm 0.034$  (200 ms off-times) and  $0.78 \pm 0.031$  (500 ms off-times). Subsequently we multiplied the  
445 probability to follow the rotating light or the highest value in case of the dark control (DC) with the  
446 radius to estimate the precision.

#### 447 Field Recordings

448 Field recordings were made alongside two different Islands in the Banda Sea (Indonesia). Several  
449 schools of *A. katoptron* were observed via snorkeling on the shallow reef flats of Pulau Gunung Api,  
450 Banda Islands ( $4^{\circ}30'20.2''S$   $129^{\circ}52'49.7''E$ ). Recordings on the Banda Islands were made after sunset  
451 on 1<sup>st</sup>-4<sup>th</sup> of March 2019 prior new moon (7<sup>th</sup> of March 2019) and the 26<sup>th</sup> of March 2019 (five days  
452 after full moon). Recordings on the Banda Islands were made before moonrise. Schools of  
453 *A. katoptron* occur from deeper water (> 60 m; pers. obs.) or caves during dark and moonless nights  
454 on the shallow reef flats of Gunung Api. The observation site in Ambon ( $3^{\circ}44'54.5''S$   $128^{\circ}12'43.3''E$ )  
455 was quite different and recordings made while scuba diving. Schools were hiding throughout the day  
456 in a large cave (main chamber dimensions approximately 10 x 5 x 6 m) with many small crevices that  
457 were not accessible. The cave entrance was in approximately 6 m depth beneath the water surface  
458 depending on the tide. Field recordings in Ambon were made between 19<sup>th</sup>-20<sup>th</sup> of March 2019  
459 before full moon (21<sup>st</sup> of March) and on 17. April 2019 before full moon (19<sup>th</sup> of April 2019). During  
460 the day, recordings were made in the cave and continued while sunset when schools of *A. katoptron*  
461 emerged through the cave exit. After several minutes schools accumulated in front of the cave where  
462 overhanging rock casts a shadow of the moonlight. This was leading to a restricted area of

463 movement. We defined three different recording conditions to analyze the behavior in *A. katoptron*:  
464 1. “resting” (recordings in the cave during day without illumination); 2. “schooling” (outside cave or  
465 on reef flat during night without illumination) and 3. “avoidance” (avoidance elicited by red diving  
466 torch during night).

467 Video recordings were made with a modified camera (Canon Powershot G1X Mark 2; APS-C-Sensor;  
468 24 megapixel; video resolution: 1920 x 1080 pix; 30 fps). The infrared filter in front of the camera  
469 sensor was removed to obtain infrared sensitivity. The camera was placed in an underwater housing  
470 (Canon WP-DC53). Two custom made underwater infrared lights mounted on both sides of the  
471 underwater housing were used to illuminate schools of *A. katoptron* in the cave and open water.  
472 Each IR-light consisted of five high power IR-LED with 860 nm peak wavelength (WEPIR1-S1 IR Power  
473 1 W, Winger Electronics GmbH, Germany).

474 A LED diving torch with red light (300 lumen red light; 634 nm peak wavelength; Codylight 1500;  
475 Codygear; Germany) was switched on while the school was swimming outside the cave or on the reef  
476 flat to elicit avoidance reactions. “Avoidance” was triggered pseudorandomized when specimen were  
477 within a range of approximately 1.5 m to ensure sufficient illumination with IR-lights. The red light  
478 was switched on until the school disappeared from view. After *A. katoptron* gathered outside the  
479 cave a minimum of two minutes was waited before red torches were repeatedly turned on.

480 We recorded n=5 video sequences (709 blink events in 326 seconds) for “resting” in the cave, n=8  
481 video sequences (444 blink events in 272 seconds) during “schooling” on the reef flat and n=5 video  
482 sequences (478 blink events in 40 seconds) in case of “avoidance”.

483 Relative distances between school members were estimated via ImageJ (ImageJ 1.50i; National  
484 Institute of Health). We compared single screenshots taken from video sequences of schooling  
485 *A. katoptron* without (n=37) and with illumination with red torches (n=46). We defined relative  
486 length (SL) of at least one individual as reference to estimate the relative distance between members  
487 of the school. We chose distances between individuals that seemed to be neighbors as two-  
488 dimensional recording could not provide a distinct spatial distribution (see also Fig. S4).

489 Blink frequencies were analyzed using the video analysis software Vidana 1.0. Specimens of  
490 *A. katoptron* were marked after the first occurrence in the video sequence and the behavior was  
491 analyzed until the specimen disappeared in the recording sequence. Exposure and Occlusion of light  
492 organs was analyzed frame by frame per individual occurrence. Mean values were summarized for all  
493 analyzed parameters. Blink frequencies were estimated based on pairs of light organ exposure and  
494 occlusion times. We created a Gaussian distribution (Fig. 4) using the internal SigmaPlot function  
495 (SigmaPlot 12.0) to show the distribution of blink frequencies during three situations in the field

496 (“resting”, “schooling” & “avoidance”). Additionally, we created histograms with the internal Matlab  
497 function (Matlab R2015b). Here we chose a bin size of 0,6 Hz.

#### 498 Statistical Analysis

499 SigmaPlot 12.0 was used to evaluate statistical differences between test groups. Differences in blink  
500 frequencies, exposure and occlusion times of light organs, distance between individuals, swimming  
501 speed and spatial distribution were compared using a repeated measurement one-way ANOVA and  
502 Holm-Sidak post hoc analysis. All values are reported as mean  $\pm$  SEM (standard error of mean).  
503 Statistical significant values are reported as: \*  $p \leq 0.05$ , \*\*  $p \leq 0.01$ , \*\*\*  $p \leq 0.001$ .

504 References

- 505 1. Haddock, S. H. D., Moline, M. A. & Case, J. F. Bioluminescence in the sea. *Annual*  
506 *review of marine science* **2**, 443–493; 10.1146/annurev-marine-120308-081028  
507 (2010).
- 508 2. Davis, M. P., Sparks, J. S. & Smith, W. L. Repeated and Widespread Evolution of  
509 Bioluminescence in Marine Fishes. *PLOS ONE* **11**, e0155154;  
510 10.1371/journal.pone.0155154 (2016).
- 511 3. Bessho-Uehara, M. *et al.* Kleptoprotein bioluminescence: Parapriacanthus fish  
512 obtain luciferase from ostracod prey. *Science advances* **6**, eaax4942;  
513 10.1126/sciadv.aax4942 (2020).
- 514 4. Claes, J. M. & Mallefet, J. Early development of bioluminescence suggests  
515 camouflage by counter-illumination in the velvet belly lantern shark *Etmopterus*  
516 *spinax* (Squaloidea: Etmopteridae). *Journal of Fish Biology* **73**, 1337–1350;  
517 10.1111/j.1095-8649.2008.02006.x (2008).
- 518 5. Harper, R. D. & Case, J. F. Disruptive counterillumination and its anti-predatory  
519 value in the plainfish midshipman *Porichthys notatus*. *Marine Biology* **134**, 529–  
520 540; 10.1007/s002270050568 (1999).
- 521 6. Herring, P. J. Sex with the lights on? A review of bioluminescent sexual  
522 dimorphism in the sea. *J. Mar. Biol. Ass.* **87**, 829–842;  
523 10.1017/S0025315407056433 (2007).

- 524 7. Widder, E. A. Bioluminescence in the ocean: origins of biological, chemical, and  
525 ecological diversity. *Science (New York, N.Y.)* **328**, 704–708;  
526 10.1126/science.1174269 (2010).
- 527 8. Hellinger, J. *et al.* The Flashlight Fish *Anomalops katoptron* Uses Bioluminescent  
528 Light to Detect Prey in the Dark. *PLOS ONE* **12**, e0170489;  
529 10.1371/journal.pone.0170489 (2017).
- 530 9. Golani, D., Fricke, R. & Appelbaum-Golani, B. Review of the genus *Photoblepharon*  
531 (*Actinopterygii*: *Beryciformes*: *Anomalopidae*). *Acta Ichthyol. Piscat.* **49**, 33–41;  
532 10.3750/AIEP/02530 (2019).
- 533 10. Ho, H.-C. & Johnson, G. D. *Protoblepharon mccoskeri*, a new flashlight fish from  
534 eastern Taiwan (Teleostei: *Anomalopidae*). *Zootaxa*, 77–87;  
535 10.11646/zootaxa.3479.1.5 (2012).
- 536 11. Morin, J. G. *et al.* Light for All Reasons: Versatility in the Behavioral Repertoire of  
537 the Flashlight Fish. *Science* **190**, 74–76; 10.1126/science.190.4209.74 (1975).
- 538 12. Hellinger, J. *et al.* Analysis of the Territorial Aggressive Behavior of the  
539 Bioluminescent Flashlight Fish *Photoblepharon steinitzi* in the Red Sea. *Front. Mar.*  
540 *Sci.* **7**, 431; 10.3389/fmars.2020.00078 (2020).
- 541 13. Gruber, D. F. *et al.* Bioluminescent flashes drive nighttime schooling behavior and  
542 synchronized swimming dynamics in flashlight fish. *PLOS ONE* **14**, e0219852;  
543 10.1371/journal.pone.0219852 (2019).

- 544 14. Hendry, T. A., Wet, J. R. de & Dunlap, P. V. Genomic signatures of obligate host  
545 dependence in the luminous bacterial symbiont of a vertebrate. *Environmental*  
546 *microbiology* **16**, 2611–2622; 10.1111/1462-2920.12302 (2014).
- 547 15. Hendry, T. A., Wet, J. R. de, Dougan, K. E. & Dunlap, P. V. Genome Evolution in the  
548 Obligate but Environmentally Active Luminous Symbionts of Flashlight Fish.  
549 *Genome biology and evolution* **8**, 2203–2213; 10.1093/gbe/evw161 (2016).
- 550 16. Haneda, Y. & Tsuji, F. I. Light production in the luminous fishes Photoblepharon  
551 and Anomalops from the Banda Islands. *Science (New York, N.Y.)* **173**, 143–145;  
552 10.1126/science.173.3992.143 (1971).
- 553 17. Bassot, J.-M. in *Bioluminescence in Progress*, edited by F. H. Johnson & Y. Haneda  
554 (Princeton University Press 1966), pp. 557–610.
- 555 18. Watson, M., Thurston, E. L. & Nicol, J. A. C. Reflectors in the Light Organ of  
556 Anomalops (Anomalopidae, Teleostei). *Proceedings of the Royal Society of London.*  
557 *Series B, Biological Sciences* **202**, 339–351 (1978).
- 558 19. Mark, M. D. *et al.* Visual tuning in the flashlight fish Anomalops katoptron to  
559 detect blue, bioluminescent light. *PLOS ONE* **13**, e0198765;  
560 10.1371/journal.pone.0198765 (2018).
- 561 20. Howland, H. C., Murphy, C. J. & McCosker, J. E. Detection of eyeshine by flashlight  
562 fishes of the family anomalopidae. *Vision Research* **32**, 765–769; 10.1016/0042-  
563 6989(92)90191-K (1992).

- 564 21. McCosker, J. E. & Rosenblatt, R. H. Notes on the biology, taxonomy, and  
565 distribution of flashlight fishes (Beryciformes: Anomalopidae). *Jap. Jour. Ich.* **34**,  
566 157–164; 10.1007/BF02912410 (1987).
- 567 22. Parrish, J. K., Viscido, S. V. & Grünbaum, D. Self-organized fish schools: an  
568 examination of emergent properties. *The Biological bulletin* **202**, 296–305;  
569 10.2307/1543482 (2002).
- 570 23. Pitcher, T. J. (ed.). *Behaviour of teleost fishes* (Chapman & Hall, London, 1993).
- 571 24. Helfman, G. S., Collette, B. B., Facey, D. E. & Bowen, B. W. *The diversity of fishes.*  
572 *Biology, evolution, and ecology.* 2nd ed. (Wiley-Blackwell, Oxford, 2009).
- 573 25. McLean, S., Persson, A., Norin, T. & Killen, S. S. Metabolic Costs of Feeding  
574 Predictively Alter the Spatial Distribution of Individuals in Fish Schools. *Current*  
575 *Biology* **28**, 1144-1149.e4; 10.1016/j.cub.2018.02.043 (2018).
- 576 26. Pitcher, T. J., Magurran, A. E. & Winfield, I. J. Fish in larger shoals find food faster.  
577 *Behavioral Ecology and Sociobiology* **10**, 149–151; 10.1007/BF00300175 (1982).
- 578 27. Ioannou, C. C., Guttal, V. & Couzin, I. D. Predatory fish select for coordinated  
579 collective motion in virtual prey. *Science (New York, N.Y.)* **337**, 1212–1215;  
580 10.1126/science.1218919 (2012).
- 581 28. Turner, G. F. & Pitcher, T. J. Attack Abatement: A Model for Group Protection by  
582 Combined Avoidance and Dilution. *The American Naturalist* **128**, 228–240;  
583 10.1086/284556 (1986).



- 584 29. Landeau, L. & Terborgh, J. Oddity and the 'confusion effect' in predation. *Animal*  
585 *Behaviour* **34**, 1372–1380; 10.1016/S0003-3472(86)80208-1 (1986).
- 586 30. Kowalko, J. E. *et al.* Loss of Schooling Behavior in Cavefish through Sight-  
587 Dependent and Sight-Independent Mechanisms. *Current Biology* **23**, 1874–1883;  
588 10.1016/j.cub.2013.07.056 (2013).
- 589 31. Partridge, B. L. & Pitcher, T. J. The sensory basis of fish schools: Relative roles of  
590 lateral line and vision. *J. Comp. Physiol.* **135**, 315–325; 10.1007/BF00657647  
591 (1980).
- 592 32. Herbert-Read, J. E. *et al.* How predation shapes the social interaction rules of  
593 shoaling fish. *Proceedings. Biological sciences* **284**; 10.1098/rspb.2017.1126  
594 (2017).
- 595 33. Bierbach, D. *et al.* Using a robotic fish to investigate individual differences in social  
596 responsiveness in the guppy. *Royal Society open science* **5**, 181026;  
597 10.1098/rsos.181026 (2018).
- 598 34. Berdahl, A., Torney, C. J., Ioannou, C. C., Faria, J. J. & Couzin, I. D. Emergent  
599 sensing of complex environments by mobile animal groups. *Science (New York,*  
600 *N.Y.)* **339**, 574–576; 10.1126/science.1225883 (2013).
- 601 35. Sosna, M. M. G. *et al.* Individual and collective encoding of risk in animal groups.  
602 *Proceedings of the National Academy of Sciences of the United States of America*  
603 **116**, 20556–20561; 10.1073/pnas.1905585116 (2019).

- 604 36. Kunz, H. & Hemelrijk, C. K. Artificial fish schools: collective effects of school size,  
605 body size, and body form. *Artificial life* **9**, 237–253;  
606 10.1162/106454603322392451 (2003).
- 607 37. Worm, M. *et al.* Evidence for mutual allocation of social attention through  
608 interactive signaling in a mormyrid weakly electric fish. *Proceedings of the*  
609 *National Academy of Sciences of the United States of America* **115**, 6852–6857;  
610 10.1073/pnas.1801283115 (2018).
- 611 38. Marras, S., Batty, R. S. & Domenici, P. Information transfer and antipredator  
612 maneuvers in schooling herring. *Adaptive Behavior* **20**, 44–56;  
613 10.1177/1059712311426799 (2012).
- 614 39. Cohen, A. C. & Morin, J. G. It's All About Sex: Bioluminescent Courtship Displays,  
615 Morphological Variation and Sexual Selection in Two New Genera of Caribbean  
616 Ostracodes. *Journal of Crustacean Biology* **30**, 56–67; 10.1651/09-3170.1 (2010).
- 617 40. Rivers, T. J. & Morin, J. G. Complex sexual courtship displays by luminescent male  
618 marine ostracods. *The Journal of experimental biology* **211**, 2252–2262;  
619 10.1242/jeb.011130 (2008).
- 620 41. Widder, E. A., Latz, M. I., Herring, P. J. & Case, J. F. Far red bioluminescence from  
621 two deep-sea fishes. *Science (New York, N.Y.)* **225**, 512–514;  
622 10.1126/science.225.4661.512 (1984).

- 623 42. Mensinger, A. F. & Case, J. F. Luminescent properties of deep sea fish. *Journal of*  
624 *Experimental Marine Biology and Ecology* **144**, 1–15; 10.1016/0022-  
625 0981(90)90015-5 (1990).
- 626 43. Sasaki, A. *et al.* Field Evidence for Bioluminescent Signaling in the Pony Fish,  
627 *Leiognathus elongatus*. *Environmental Biology of Fishes* **66**, 307–311;  
628 10.1023/A:1023959123422 (2003).
- 629 44. McFall-Ngai, M. J. & Dunlap, P. V. Three new modes of luminescence in the  
630 leiognathid fish *Gazza minuta*: Discrete projected luminescence, ventral body  
631 flash, and buccal luminescence. *Marine Biology* **73**, 227–237;  
632 10.1007/BF00392247 (1983).
- 633 45. Johnson, G. D. & Rosenblatt, R. H. Mechanisms of light organ occlusion in  
634 flashlight fishes, family Anomalopidae (Teleostei: Beryciformes), and the evolution  
635 of the group. *Zoological Journal of the Linnean Society* **94**, 65–96; 10.1111/j.1096-  
636 3642.1988.tb00882.x (1988).
- 637 46. Herbert-Read, J. E. *et al.* Inferring the rules of interaction of shoaling fish.  
638 *Proceedings of the National Academy of Sciences of the United States of America*  
639 **108**, 18726–18731; 10.1073/pnas.1109355108 (2011).
- 640 47. Siebeck, U. E., Parker, A. N., Sprenger, D., Mäthger, L. M. & Wallis, G. A species of  
641 reef fish that uses ultraviolet patterns for covert face recognition. *Current biology :*  
642 *CB* **20**, 407–410; 10.1016/j.cub.2009.12.047 (2010).

- 643 48. Larsch, J. & Baier, H. Biological Motion as an Innate Perceptual Mechanism Driving  
644 Social Affiliation. *Current Biology* **28**, 3523-3532.e4; 10.1016/j.cub.2018.09.014  
645 (2018).
- 646 49. Kasumyan, A. O. Acoustic signaling in fish. *J. Ichthyol.* **49**, 963–1020;  
647 10.1134/S0032945209110010 (2009).
- 648 50. Santon, M. *et al.* Redirection of ambient light improves predator detection in a  
649 diurnal fish. *Proceedings. Biological sciences* **287**, 20192292;  
650 10.1098/rspb.2019.2292 (2020).
- 651 51. Bainbridge, R. The Speed of Swimming of Fish as Related to Size and to the  
652 Frequency and Amplitude of the Tail Beat. *Journal of Experimental Biology* **35**, 109  
653 (1958).
- 654 52. Videler, J. J. & Wardle, C. S. Fish swimming stride by stride: speed limits and  
655 endurance. *Rev Fish Biol Fisheries* **1**, 23–40; 10.1007/BF00042660 (1991).
- 656 53. Ware, D. M. Bioenergetics of Pelagic Fish: Theoretical Change in Swimming Speed  
657 and Ration with Body Size. *J. Fish. Res. Bd. Can.* **35**, 220–228; 10.1139/f78-036  
658 (1978).
- 659 54. Meyer-Rochow, V. B. Loss of bioluminescence in *Anomalops katoptron* due to  
660 starvation. *Experientia* **32**, 1175–1176; 10.1007/BF01927610 (1976).
- 661 55. Barber, I., Downey, L. C. & Braithwaite, V. A. Parasitism, oddity and the  
662 mechanism of shoal choice. *Journal of Fish Biology* **53**, 1365–1368;  
663 10.1111/j.1095-8649.1998.tb00256.x (1998).

664 56. Ward, A. J. W., Duff, A. J., Krause, J. & Barber, I. Shoaling behaviour of sticklebacks  
665 infected with the microsporidian parasite, *Glugea anomala*. *Environ Biol Fish* **72**,  
666 155–160; 10.1007/s10641-004-9078-1 (2005).

667 57. Theodorakis, C. W. Size segregation and the effects of oddity on predation risk in  
668 minnow schools. *Animal Behaviour* **38**, 496–502; 10.1016/S0003-3472(89)80042-9  
669 (1989).

670 58. Steche, O. *Die Leuchtorgane von Anomalops katoptron und Photoblepharon*  
671 *palpebratus*, zwei Oberflächenfischen aus dem malayischen Archipel: Ein Beitrag  
672 zur Anatomie und Physiologie der Leuchtorgane der Fische (Z Wiss Zool., 1909).

673 59. Parrish, J. K. & Edelstein-Keshet, L. Complexity, pattern, and evolutionary trade-  
674 offs in animal aggregation. *Science (New York, N.Y.)* **284**, 99–101;  
675 10.1126/science.284.5411.99 (1999).

676 60. Woodland, D. J., Cabanban, A. S., Taylor, V. M. & Taylor, R. J. A synchronized  
677 rhythmic flashing light display by schooling *Leiognathus splendens* (Leiognathidae  
678 : Perciformes). *Mar. Freshwater Res.* **53**, 159; 10.1071/MF01157 (2002).

679

680 **Supplemental Figures**

681

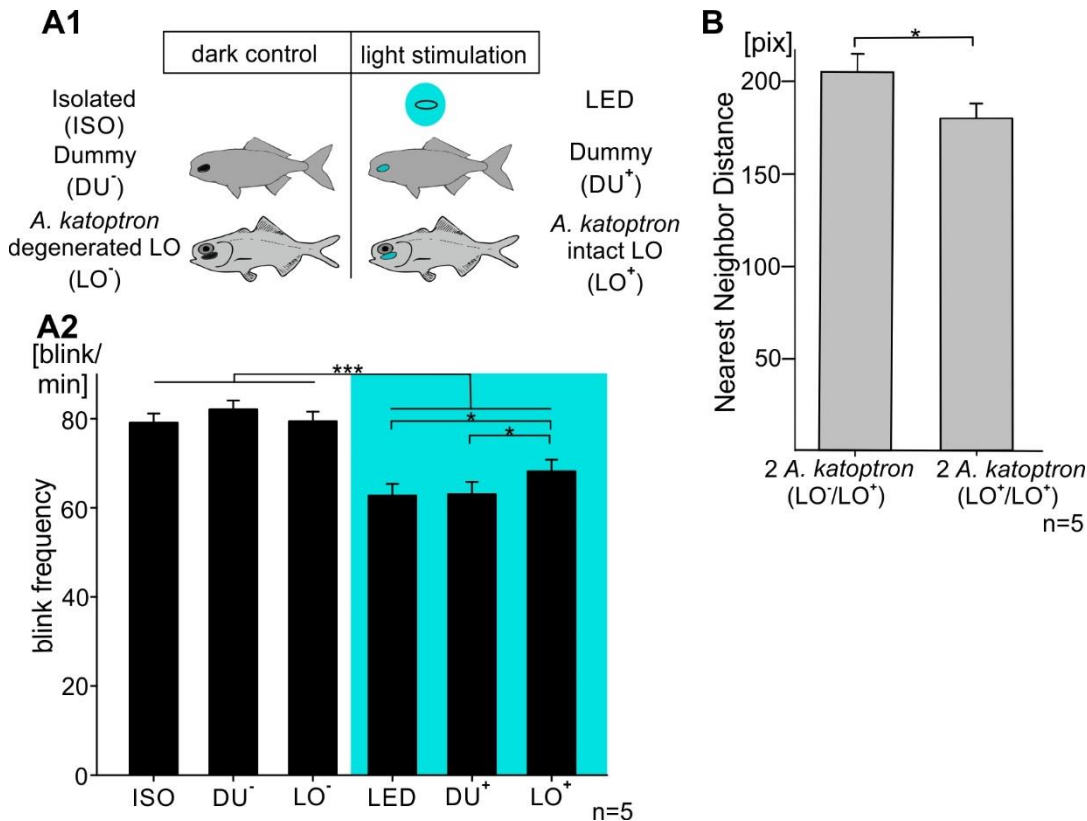

682

683 **Figure S1. Blink behavior of *A. katoptron* during exposure to different artificial light stimuli and their**  
 684 **orientation towards conspecifics.**

685 (A1) Natural and artificial light stimulation used in the experiments to investigate the blink behavior of  
 686 *A. katoptron*. Two different types (light stimulation or dark controls) were presented to isolated individuals, i.e.  
 687 an isolated LED and a fish dummy, equipped with a LED at the position of the light organ. Artificial lights had  
 688 the same size, intensities and emitted 1 Hz light pulses (equally distributed LED on- and off- times).  
 689 Experiments were repeated 5 times with five individuals independently and values are given as mean ( $\pm$  SEM).  
 690 The behavioral responses to the artificial lights were compared to responses to *A. katoptron* with an intact light  
 691 organ (LO<sup>+</sup>) and a degenerated light organ (LO<sup>-</sup>).

692 (A2) Blink frequencies of isolated *A. katoptron* during exposure to dark controls (left, white background) and  
 693 light stimulation (right, blue background). Blink frequencies were reduced in the presence of light-stimuli. LED  
 694 and the fish dummy light stimuli reduced the blink frequency more than the conspecifics.

695 (B) *A. katoptron* show a closer mean ( $\pm$  SEM) orientation towards its neighbors when both specimen display  
 696 intact light organs (LO<sup>+</sup>/LO<sup>+</sup>).

697 Statistical significance was evaluated with RM ANOVA.

698 Significance values are reported as: \*p < 0.05, \*\*p < 0.01, \*\*\*p < 0.001. Error bars indicate SEM.

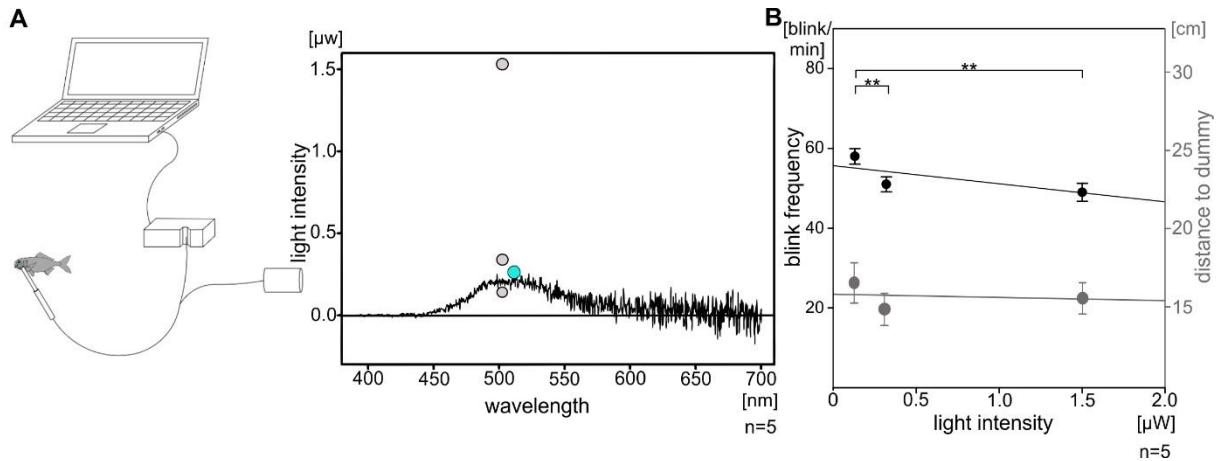

699  
700 **Figure S2. Spectrometric measurements of the light intensities emitted by light organs of *A. katoptron* in**  
701 **comparison to LEDs and the dependency of blinking behavior on different light intensities.**

702 (A) Spectrometric measurement of the light organ ( $n=5$ ) intensity of *A. katoptron* in comparison to LED light.  
703 Diagram of the experimental setup for the spectrometric measurements (left). Intensities were measured with  
704 a spectrometer (Flame S-UV-VIS-ES, Ocean Optics, USA). The spectroscopic probe was placed in front of the  
705 light organs of fixed individuals. Each light organ was measured five times and mean intensity averaged.  
706 Example trace of the spectrometric measurement of the light intensities emitted by the light organs measured  
707 in the range between 400 – 700 nm wavelength (right). Gray dots indicate three different LED intensities of  
708 0.133, 0.328 & 1.523  $\mu\text{W}$  at 504 nm wavelength, which were presented to isolated flashlight fish (*A. katoptron*)  
709 to investigate impact on blink frequency. The green dot indicates the maximum intensity observed in  
710 *A. katoptron* (0.27  $\mu\text{W}$  at 510 nm wavelength).

711 (B) Blink frequency responses of *A. katoptron* and distance to dummy triggered by the three distinct LED  
712 intensities detected at 504 nm wavelengths as shown in A. Experiments were repeated 5 times independently  
713 and values are given as mean ( $\pm$  SEM). Blink frequencies of *A. katoptron* were decreased with increasing  
714 intensities of the LED.

715 Statistical significance was evaluated with RM ANOVA.

716 Significance values reported as: \*\* $p < 0.01$ . Error bars indicate  $\pm$  SEM.

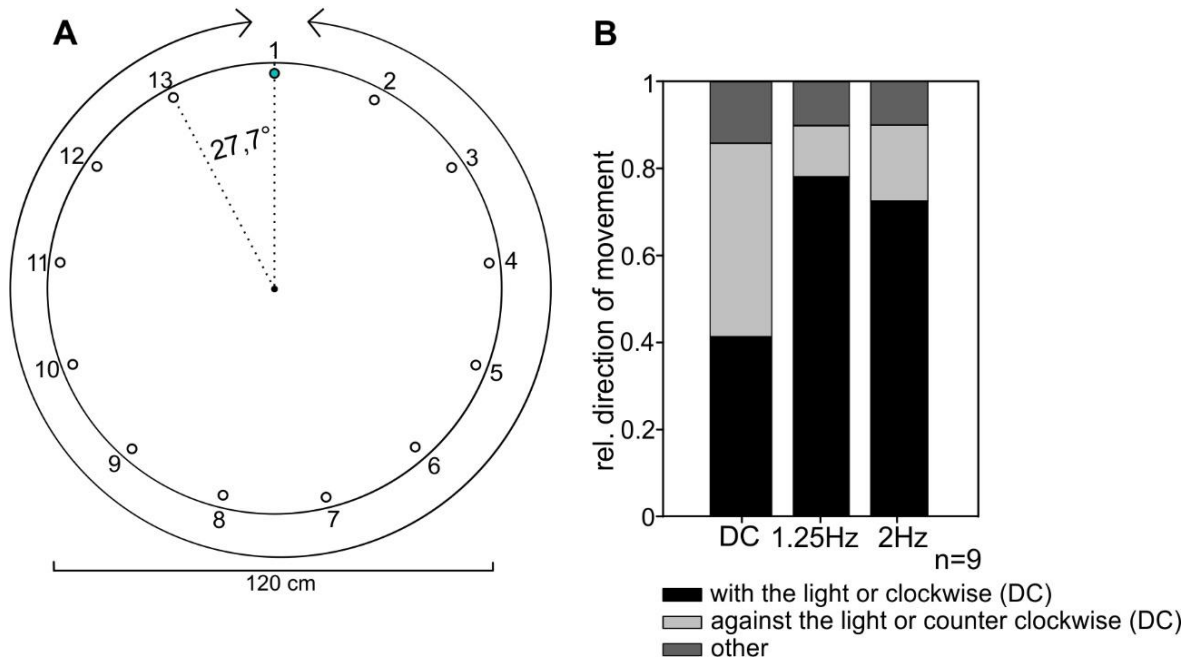

717

718 **Figure S3. A. *katoptron* follow moving light stimuli.**

719 (A) Experimental setup with 13 wall mounted LEDs that were triggered consecutively counter- or clockwise.  
720 Intervals between 300 ms light emittance were 200 or 500 ms (travelling speed of light: 200 ms, 0.58 m/s;  
721 500 ms, 0.36 m/s). Additionally, we performed a control without light stimulation (DC, dark control). Each fish  
722 was tested for 60 seconds.

723 (B) Relative direction of *A. katoptron* following artificial light sources. Flashlight fish show a high motivation to  
724 follow the direction of light (1.25 & 2 Hz). In the control experiment (DC) the fish swims equally into both  
725 (counter clockwise or clockwise) directions.



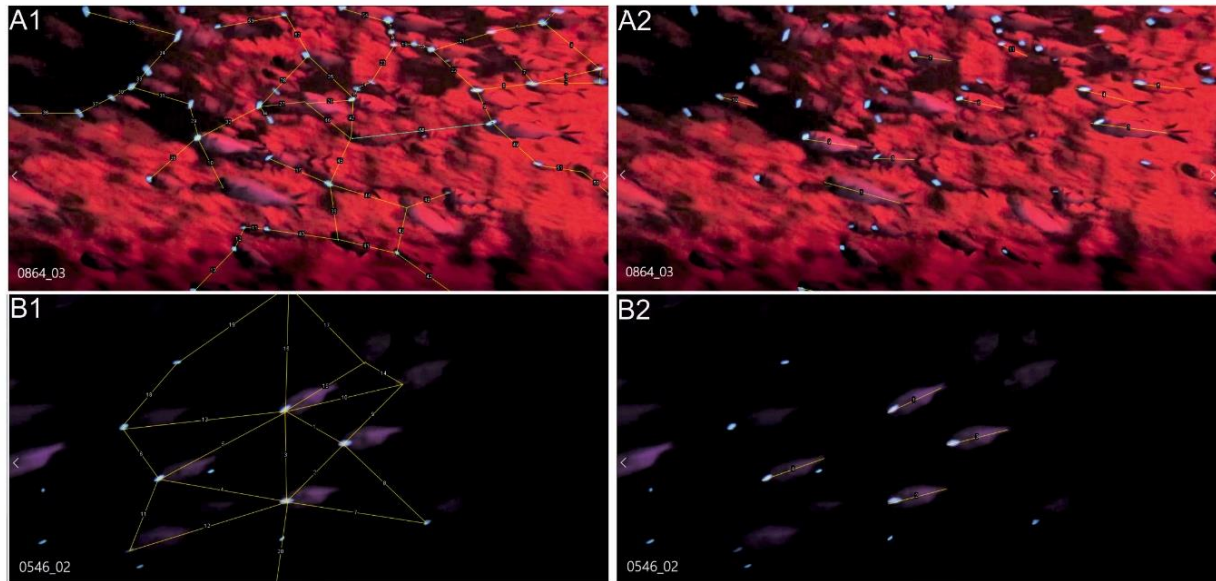

726

727 **Figure S4. Analyzing the nearest neighbor distance in schools of *A. katoptron* (Ambon, Maluku, Indonesia).**

728 (A) Flashlight fish *A. katoptron* were illuminated with diving torches (300 lumen red light; Codylight 1500;  
729 Germany) to trigger avoidance reactions. For every screenshot, we estimated the fish standard length (SL) as  
730 reference (A2) We connected light organs (A1) of individuals that seemed to be neighbors to determine their  
731 distances. 46 screenshots were analyzed.

732 (B) Groups of *A. katoptron* while schooling on the reef flat were illuminated with IR-torches and recorded with  
733 an infrared camera. Networks connect light organs of potential neighbors (B1) and standard length (SL) was  
734 estimated as reference (B2). 37 screenshots were analyzed.
